# Supplementary material for: A noble gas sensor platform: linear dense assemblies of single-walled carbon nanotubes (LACNTs) in a multi-layered ceramic/metal electrode system (MLES)
Source: Royal Society of Chemistry journal article supplement (doi:10.1039/c7tc03576d), 2017-11-20
Supplement: c7tc03576d1.pdf [file c7tc03576d1.pdf]

*Electronic Supplementary Information*

## **A Noble Gas Sensor Platform: Linear Dense Assemblies of Single-wall Carbon Nanotubes (LACNTs) in a Multi-layered Ceramic/Metal Electrode System (MLES)**

Tae-Yeon Hwang<sup>a†</sup>, Yo-min Choi<sup>b†</sup>, YoSeb Song<sup>a</sup>, Nu Si A Eom<sup>a</sup>, Seil Kim<sup>a</sup>, Hong-Baek Cho<sup>a</sup>,  
Nosang V. Myung<sup>c,\*</sup>, Yong-Ho Choa<sup>a,\*</sup>

<sup>a</sup> Department of Fusion Chemical Engineering, Hanyang University, Ansan 426-791, Republic of Korea

<sup>b</sup> Material Technology Center, Korea Testing Laboratory, Ansan 426-910, Republic of Korea

<sup>c</sup> Department of Chemical and Environmental Engineering, University of California, Riverside, CA 92521, USA

\* Corresponding authors.

Tel.: +82-31-400-5650; Fax: +82-31-400-8128; *E-mail address*: [choa15@hanyang.ac.kr](mailto:choa15@hanyang.ac.kr) (Y.-H. Choa)

Tel.: +1-951-927-7710; Fax: +1-951-827-5695; *E-mail address*: [myung@engr.ucr.edu](mailto:myung@engr.ucr.edu) (N. V. Myung)

† These authors contributed equally to this work.

### Calculation method of Pt nano crystals on SWCNTs.

- To quantify the amount of Pt nano crystals (NCs) decorated on bare and acid-treatment SWCNTs, we used the low magnification TEM images as shown below.

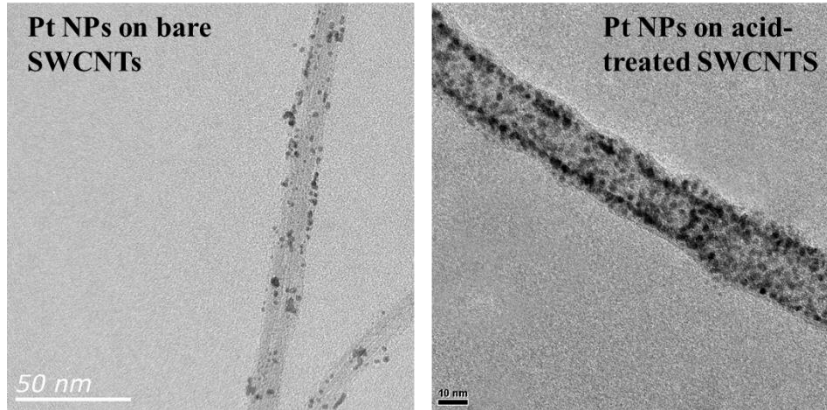

[low magnification image of Fig. 7 (b), (c) in the manuscript]

- At first, we measured the size of Pt NCs in each images. The mean size of Pt NPs on bare SWCNTs (b-SWCNTs) was 2.67 nm and Pt NPs on acid-treated SWCNTs (a-SWCNTs) was 2.1 nm. Next, we calculated the number of particles per 140 nm of SWCNTs and the results was 56 for b-SWCNTs and 164 for a-SWCNTs. Then, we calculated the volume of the Pt NPs and changed them to mass multiplied by density. Finally, we got the mass per nm of SWCNT ( $\text{g/nm}_{\text{SWCNT}}$ ). The amount of deposited Pt NCs was decreased from  $1.14 \times 10^{-18} \text{ g/nm}_{\text{SWCNT}}$  for Pt NCs on acid-modified SWCNTs to  $7.99 \times 10^{-19} \text{ g/nm}_{\text{SWCNT}}$  for pristine SWCNTs.

## Figures

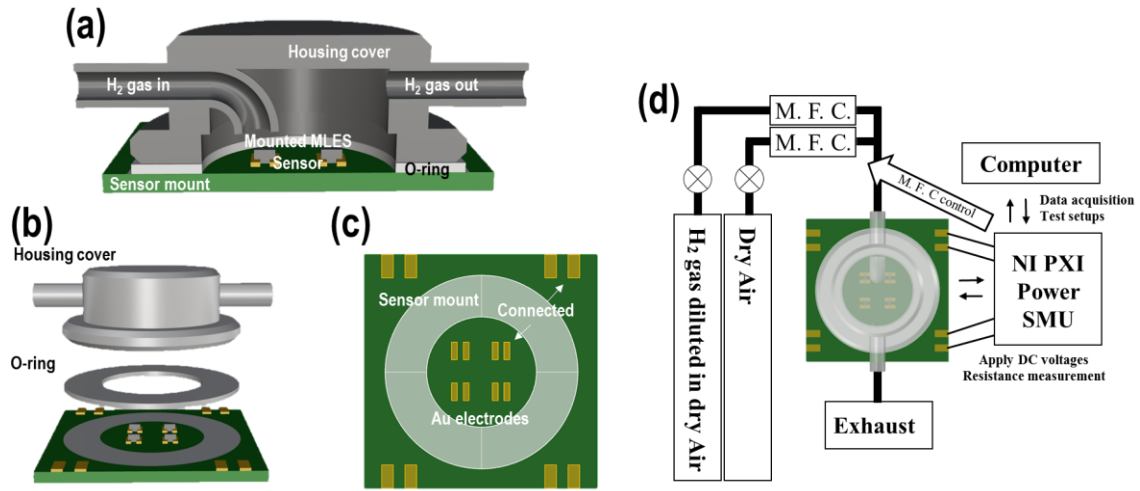

Fig. S1 Setups of the gas sensing chamber: (a) assembled chamber, (b) assembling components, (c) mounting board, and (d) overall test systems.

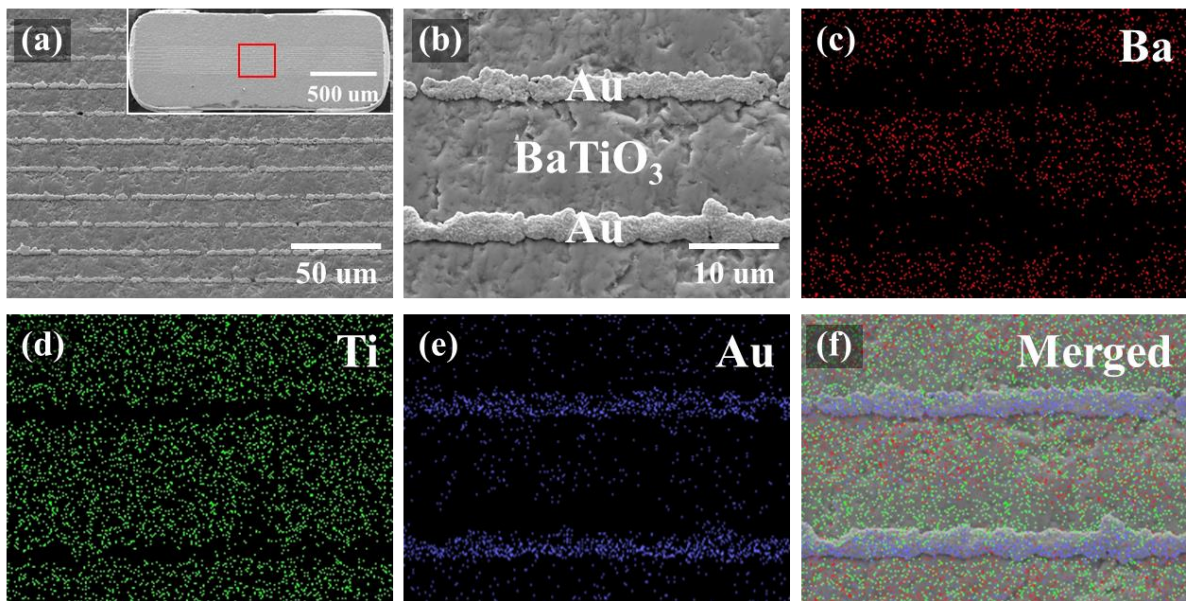

Fig. S2 FE\_SEM images of (a) Au electrodes in MLES, (b) magnified surface of MLES, and (c – f) EDS mapping results of the surface.

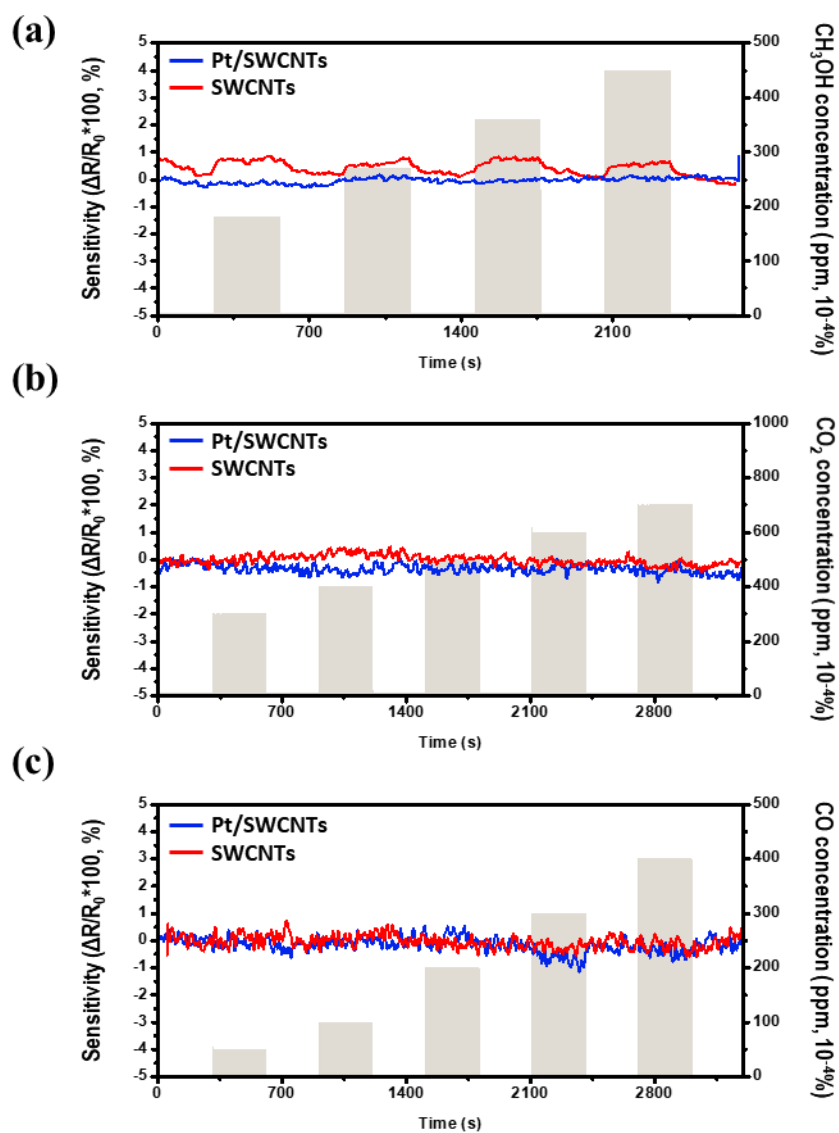

Fig. S3 Time dependent response of the electrical resistance change of the MLES-based Pt/SWCNTs and SWCNTs gas sensors as a function of the CH<sub>3</sub>OH, CO<sub>2</sub> and CO concentrations at room temperature.

## Table

**Table S1. The sensitivity, response time ( $T_{90}$ ) and recovery time ( $D_{50}$ ) of the sensors for  $H_2$ ,  $H_2S$ ,  $NO_2$  and  $NH_3$  gases at each concentrations.**

| Gas concentration | Sensitivity (%) |        | Response time ( $T_{90}$ , Sec. ) |        | Recovery time ( $D_{50}$ , Sec.) |        |
|-------------------|-----------------|--------|-----------------------------------|--------|----------------------------------|--------|
|                   | Pt/SWCNTs       | SWCNTs | Pt/SWCNTs                         | SWCNTs | Pt/SWCNTs                        | SWCNTs |
| $H_2$ 50 ppm      | 0.44            | 0.03   | 109.08                            | -      | 24.65                            | -      |
| $H_2$ 100 ppm     | 0.50            | 0.01   | 92.93                             | -      | 14.92                            | -      |
| $H_2$ 500 ppm     | 1.25            | 0.05   | 141.99                            | -      | 13.03                            | -      |
| $H_2$ 1000 ppm    | 2.01            | 0.11   | 105.21                            | -      | 11.51                            | -      |
| $H_2$ 3000 ppm    | 5.22            | 0.19   | 145.61                            | -      | 9.46                             | -      |
| $H_2S$ 5 ppm      | 1.98            | 0.76   | 210.91                            | 225.65 | 160.65                           | -      |
| $H_2S$ 10 ppm     | 3.15            | 1.17   | 212.43                            | 260.78 | 188.95                           | -      |
| $H_2S$ 20 ppm     | 4.53            | 1.82   | 252.57                            | 265.71 | 194.40                           | -      |
| $H_2S$ 40 ppm     | 5.94            | 2.73   | 193.39                            | 253.61 | 180.96                           | -      |
| $H_2S$ 60 ppm     | 7.43            | 3.60   | 195.56                            | 244.30 | 179.39                           | -      |
| $H_2S$ 100 ppm    | 8.24            | 4.63   | 183.16                            | 285.28 | 160.79                           | -      |
| $NO_2$ 5 ppm      | -9.87           | -3.94  | 182.75                            | 224.73 | 203.20                           | -      |
| $NO_2$ 10ppm      | -14.87          | -8.06  | 191.30                            | 250.17 | 104.95                           | -      |
| $NO_2$ 30 ppm     | -22.61          | -16.30 | 170.39                            | 224.57 | 111.81                           | -      |
| $NO_2$ 50 ppm     | -27.73          | -21.58 | 170.06                            | 213.78 | 264.33                           | -      |
| $NH_3$ 10 ppm     | 2.37            | 2.26   | 188.91                            | 274.34 | 57.63                            | 29.66  |
| $NH_3$ 30 ppm     | 4.72            | 3.82   | 215.12                            | 172.91 | 51.68                            | 16.60  |
| $NH_3$ 50 ppm     | 5.28            | 4.26   | 73.23                             | 42.88  | 24.64                            | 121.25 |
| $NH_3$ 70 ppm     | 8.09            | 6.24   | 208.26                            | 158.04 | 13.05                            | 17.61  |
